# Supplementary material for: Effect of soluble oat fiber on intestinal microenvironment and TNBS-induced colitis
Source: Royal Society of Chemistry journal article supplement (doi:10.1039/d2fo03396h), 2023-01-01
Supplement: d2fo03396h1.pdf [file d2fo03396h1.pdf]

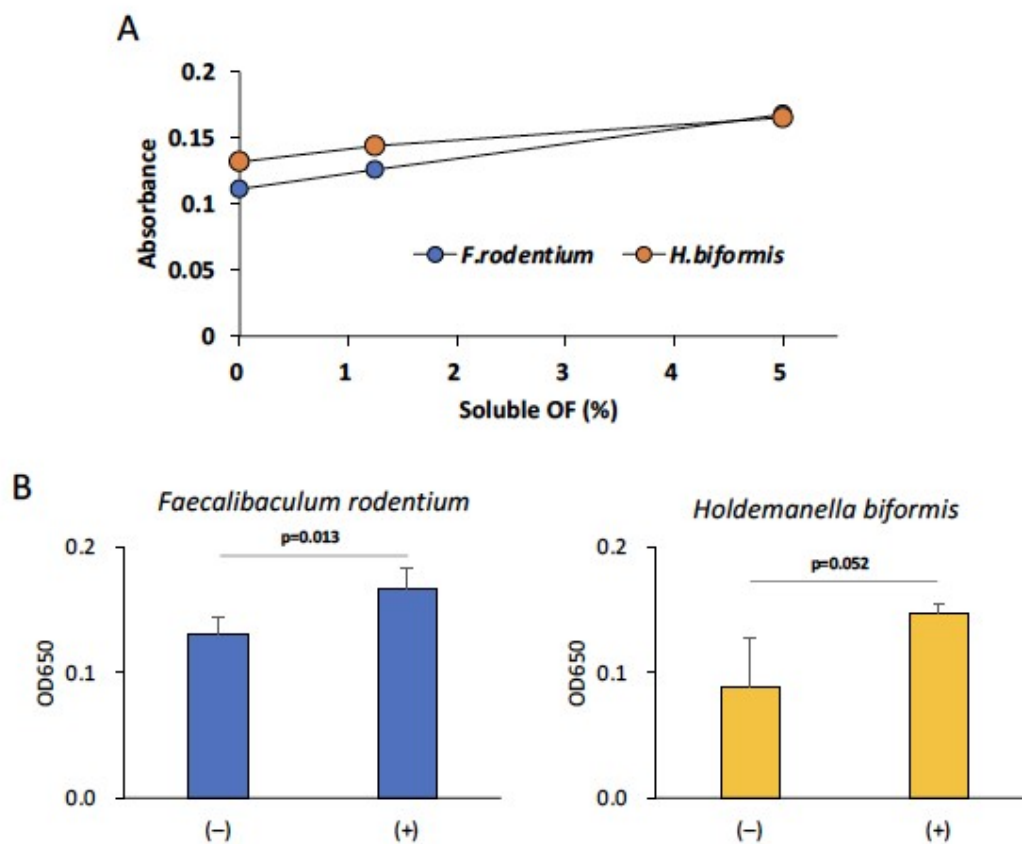

**Supplementary Figure 1. Soluble OF-induced bacterial growth *in vitro*.** (A, B) Density of *Faecalibaculum rodentium* or *Holdemanella bififormis* in the culture medium was measured 16 h after inoculating bacteria to a starch-free GAM medium in the presence or absence of soluble OF (1.25 or 5 %). Two independent experiments showing the average of two samples (A) and statistical significance between control (-) and soluble OF (+) (B). Values and error bars indicates mean ± SD.

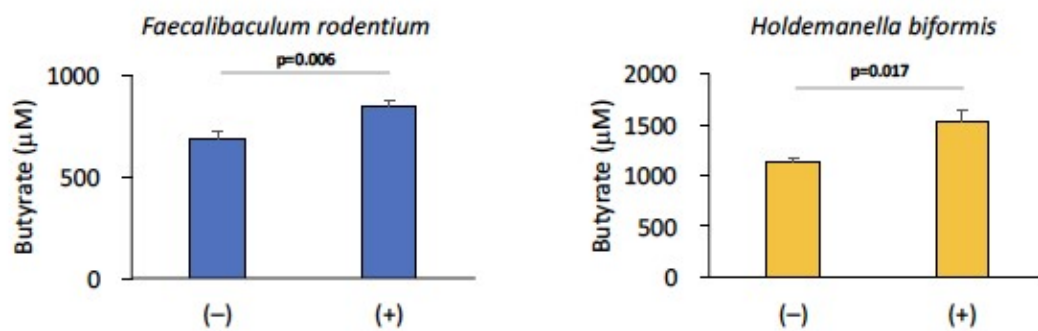

**Supplementary Figure 2. Butyrate concentration in the culture medium of *F.rodentium* and *H.biformis*.**

Gas chromatography analysis of butyrate produced by *F. rodentium* or *H. biformis* in the culture supernatant. Culture medium was collected 16 h after the inoculation of bacteria to starch-free GAM medium in the presence (+) or absence (-) of soluble OF (n = 3). Values and error bars indicates mean  $\pm$  SD.

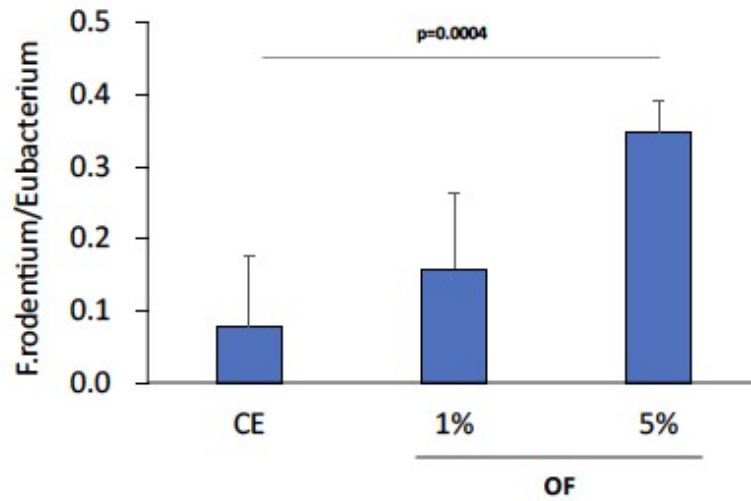

**Supplementary Figure 3. Relative abundance of *F. rodentium* in OF-fed mice for one week.** RT-PCR analysis of eubacterium and *F.rodentium* in fecal DNA isolated from mice fed CE or OF (1 or 5%) for 1 week (n = 6). Values and error bars indicates mean  $\pm$  SD.

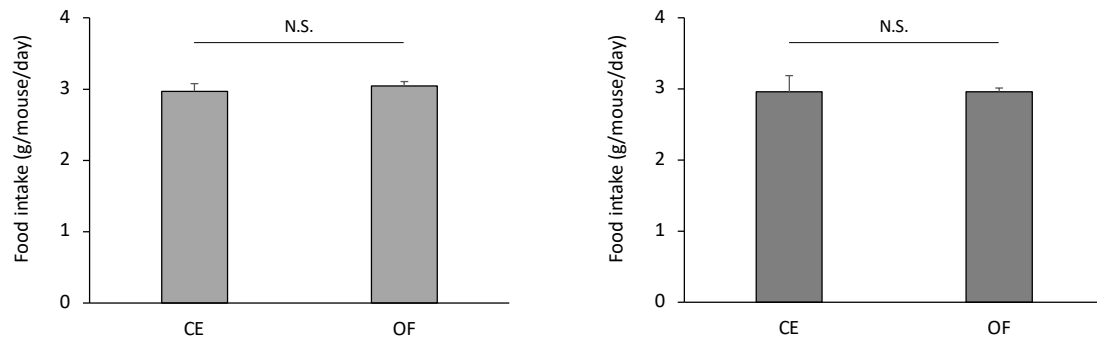

**Supplementary Figure 4. Amount of food intake of mice fed chow containing CE or OF (5%) .** The six cages (three mice/cage) were divided into two groups. One group was fed modified AIN-76A containing 5% CE, and the other was fed AIN-76A containing 5% OF. The amount of food intake was measured weekly. The left and right panels show the amounts of food intake measured during the first week and second week, respectively. Values and error bars indicates mean  $\pm$  SD. N.S.: not significant.

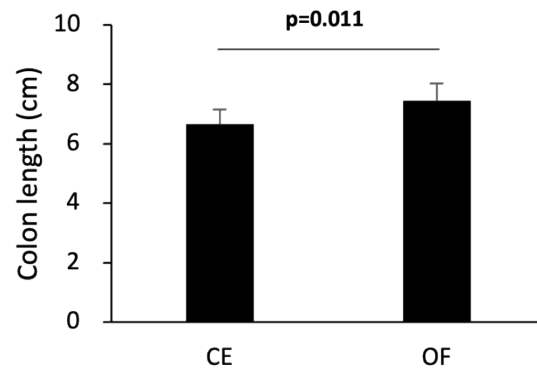

**Supplementary Figure 5. Colon length 3 days after TNBS administration in CE- or OF-fed mice.** Values and error bars indicates mean  $\pm$  SD.

| Diet                    | Modified<br>AIN-76A |       | CE   |       | OF (1%) |       | OF (2%) |       | OF (5%) |       |
|-------------------------|---------------------|-------|------|-------|---------|-------|---------|-------|---------|-------|
|                         | g%                  | kcal% | g%   | kcal% | g%      | kcal% | g%      | kcal% | g%      | kcal% |
| Protein                 | 21                  | 21    | 20   | 21    | 20      | 21    | 20      | 21    | 20      | 21    |
| Carbohydrate            | 69                  | 68    | 66   | 68    | 66      | 68    | 66      | 68    | 66      | 68    |
| Fat                     | 5                   | 12    | 5    | 12    | 5       | 12    | 5       | 12    | 5       | 12    |
| Total                   |                     | 100   |      | 100   |         | 100   |         | 100   |         | 100   |
| kcal/g                  |                     | 4.11  |      | 3.9   |         | 3.9   |         | 3.9   |         | 3.9   |
| Ingredient              | g                   | kcal  | g    | kcal  | g       | kcal  | g       | kcal  | g       | kcal  |
| Casein                  | 200                 | 800   | 200  | 800   | 200     | 800   | 200     | 800   | 200     | 800   |
| DL-Methionine           | 3                   | 12    | 3    | 12    | 3       | 12    | 3       | 12    | 3       | 12    |
| Corn Starch             | 0                   | 0     | 0    | 0     | 0       | 0     | 0       | 0     | 0       | 0     |
| Sucrose                 | 0                   | 0     | 0    | 0     | 0       | 0     | 0       | 0     | 0       | 0     |
| Dextrose                | 650                 | 2600  | 650  | 2600  | 650     | 2600  | 650     | 2600  | 650     | 2600  |
| Cellulose<br>(BW200)    | 0                   | 0     | 50   | 0     | 40      | 0     | 30      | 0     | 0       | 0     |
| Oat Fiber               | 0                   | 0     | 0    | 0     | 10      | 0     | 20      | 0     | 50      | 0     |
| Corn Oil                | 50                  | 450   | 50   | 450   | 50      | 450   | 50      | 450   | 50      | 450   |
| Mineral Mix<br>(S10001) | 35                  | 0     | 35   | 0     | 35      | 0     | 35      | 0     | 35      | 0     |
| Vitamin Mix<br>(V10001) | 10                  | 40    | 10   | 40    | 10      | 40    | 10      | 40    | 10      | 40    |
| Choline Bitartrate      | 2                   | 0     | 2    | 0     | 2       | 0     | 2       | 0     | 2       | 0     |
| Total                   | 950                 | 3902  | 1000 | 3902  | 1000    | 3902  | 1000    | 3902  | 1000    | 3902  |

**Supplementary Table 1. Composition of the diet used in this study**

| Target bacteria                 | Direction | Sequence (5' to 3')   |
|---------------------------------|-----------|-----------------------|
| Eubacterium                     | Forward   | ACTCCTACGGGAGGCAGCAGT |
|                                 | Reverse   | ATTACCGCGGCTGCTGGC    |
| <i>Faecalibaculum rodentium</i> | Forward   | CGGGAATACGCTCTGGAAA   |
|                                 | Reverse   | GCCAACCAACTAATGCACCG  |

**Supplementary Table 2. Primer sequences for qPCR**

| Group 1 | Group 2 | pseudo-F | p-value | q-value      |
|---------|---------|----------|---------|--------------|
| BG0     | BG1     | 1.378    | 0.243   | 0.292        |
| BG0     | BG2     | 1.974    | 0.124   | 0.218        |
| BG0     | BG5     | 6.246    | 0.001   | <u>0.006</u> |
| BG1     | BG2     | 1.006    | 0.385   | 0.385        |
| BG1     | BG5     | 2.964    | 0.02    | 0.060        |
| BG2     | BG5     | 1.981    | 0.145   | 0.218        |

**Supplementary Table 3. Statistical significance of  $\beta$ -diversity**

| Group 1 | Group 2 | H     | p-value | q-value      |
|---------|---------|-------|---------|--------------|
| BG0     | BG1     | 0.231 | 0.631   | 0.631        |
| BG0     | BG2     | 2.837 | 0.092   | 0.138        |
| BG0     | BG5     | 8.308 | 0.004   | <u>0.012</u> |
| BG1     | BG2     | 0.641 | 0.423   | 0.508        |
| BG1     | BG5     | 8.308 | 0.004   | <u>0.012</u> |
| BG2     | BG5     | 6.564 | 0.010   | <u>0.021</u> |

**Supplementary Table 4. Statistical significance of  $\alpha$ -diversity (Observed features)**
